# 1 **Adaptable Automated Interpretation of Rapid Diagnostic Tests Using Few-Shot Learning**

2  
3 Siddarth Arumugam<sup>1†</sup>; Jiawei Ma<sup>2†</sup>; Uzay Macar<sup>2</sup>; Guangxing Han<sup>3</sup>; Kathrine McAulay<sup>4</sup>; Darrell  
4 Ingram<sup>5</sup>; Alex Ying<sup>1</sup>; David A. M. Colburn<sup>1</sup>; Robert Stanciu<sup>1</sup>; Thomas Gryś<sup>4</sup>; Shih-Fu Chang<sup>2,3\*</sup>;  
5 Samuel K. Sia<sup>1\*</sup>

6  
7 <sup>1</sup> Department of Biomedical Engineering, Columbia University, New York, NY 10027, USA

8 <sup>2</sup> Department of Computer Science, Columbia University, New York, NY 10027, USA

9 <sup>3</sup> Department of Electrical Engineering, Columbia University, New York, NY 10027, USA

10 <sup>4</sup> Department of Laboratory Medicine and Pathology, Mayo Clinic, Phoenix, AZ 85054, USA

11 <sup>5</sup> Safe Health Systems, Inc., Los Angeles, CA 90036, USA

12  
13 † These authors contributed equally to this article.

14 \* Co-corresponding authors.

15  
16 **Key words:** Few-shot adaptation, rapid diagnostic tests, self-supervision, COVID-19, pandemic

## 17 **Abstract**

18  
19  
20 Point-of-care lateral-flow assays (LFAs) are becoming increasingly prevalent for  
21 diagnosing individual patient disease status and surveying population disease prevalence in a  
22 timely, scalable, and cost-effective manner, but a central challenge is to assure correct assay  
23 operation and results interpretation as the assays are manually performed in decentralized  
24 settings. A smartphone-based software can automate interpretation of an LFA kit, but such

25 algorithms typically require a very large number of images of assays tested with validated  
26 specimens, which is challenging to collect for different assay kits, especially for those released  
27 during a pandemic. Here, we present an approach – AutoAdapt LFA – that uses few-shot  
28 learning, an approach used in other applications such as computer vision and robotics, for  
29 accurate and automated interpretation of LFA kits that requires a small number of validated  
30 images for training. The approach consists of three components: extraction of membrane and  
31 zone areas from an image of the LFA kit, a self-supervised encoder that employs a feature  
32 extractor trained with edge-filtered patterns, and few-shot adaptation that enables generalization  
33 to new kits using limited validated images. From a base model pre-trained on a commercial LFA  
34 kit, we demonstrated the ability of adapted models to interpret results from five new COVID-19  
35 LFA kits (three detecting antigens for diagnosing active infection, and two detecting antibodies  
36 for diagnosing past infection). Specifically, using just 10 to 20 images of each new kit, we  
37 achieved accuracies of 99% to 100% for each kit. The server-hosted algorithm has an execution  
38 time of approximately 4 seconds, which can potentially enable quality assurance and linkage to  
39 care for users operating new LFAs in decentralized settings.  
40

41 **Main text**

42

43 **Introduction**

44

45 Lateral-flow assays (LFAs) present an increasing opportunity for increasing accessibility  
46 to diagnostic assays, but errors in assay operation and results interpretation hinder their  
47 deployment in decentralized settings, such as primary care clinics and homes<sup>1-5</sup>. For example,  
48 improper assay operation could produce absent control bands; alternatively, failure to identify  
49 the presence of faint bands or confusing the zone type (e.g., control vs. test bands) could lead to  
50 an incorrect interpretation of overall assay result<sup>6</sup>. For example, in the COVID-19 pandemic, a  
51 number of SARS-CoV-2 antigen tests are now approved for home use<sup>7</sup> to support decentralized  
52 testing; consequently, user errors from incorrect operation and results interpretation are also  
53 likely to become more prominent in the coming months to years.

54

55 Image-processing algorithms to automate the interpretation of LFAs and rapid diagnostic  
56 tests can potentially provide quality assurance to users in decentralized settings and reduce  
57 incidence of these errors, but existing algorithms have shortcomings such as the need to use  
58 images collected by smartphones with physical attachments<sup>5,8-14</sup>, are designed to work  
59 retrospectively with a library of pre-collected images<sup>15,16</sup>, or require a large number of labelled  
60 training images ranging in the hundreds<sup>17,18</sup> for each assay kit. By comparison, an ideal  
61 algorithm would be scalable in deployment (for example, working in real time with images  
62 collected by a smartphone camera without an extra adapter) and would not require experimental  
63 collection of a large number of expert-labelled images with validated clinical specimens across a

64 large and ever-changing roster of new LFAs, which is especially challenging to achieve during  
65 public health emergencies.

66

67 In this study, we have developed 1) an end-to-end modular workflow to work with assay  
68 kit images taken with a smartphone with no external adapters and 2) a trained algorithm that can  
69 be adapted to a new assay kit with just 10 to 20 images of the new kit in order to accurately  
70 interpret the result (**Fig. 1a**). The ideal algorithm should generalize to different LFA kits with  
71 variations in color and size of bands<sup>1,19-22</sup>: the color and intensity of bands depend on sizes and  
72 shapes of gold nanoparticles<sup>20,23</sup>, material properties of the membrane, and membrane  
73 pretreatment steps<sup>20,21</sup>; the sizes of bands depend on liquid-dispensing conditions and capillary  
74 flow time<sup>20,21</sup>. Here, we propose a few-shot adaptation strategy – which has been employed in  
75 applications ranging from computer vision to robotics<sup>24-26</sup> to learn a strong classifier for new  
76 domains<sup>27-31</sup> – to mitigate the performance drop caused by domain shift stemming from image-  
77 pattern variance, using only a few labeled images. In our few-shot model adaptation strategy,  
78 zone areas from many images of a “base” kit are cropped and used to pre-train a feature-  
79 extraction network that employs self-supervised learning with edge-filtered images. To adapt to  
80 a new assay kit, zone areas from 10 to 20 images are cropped, and the pre-trained model from the  
81 base model (shown as “B” in **Fig. 1a**) adjusts its weights to a model adapted to a new assay  
82 (shown as “N” in **Fig. 1a**) using supervised contrastive learning. Thus, for the end user  
83 operating a new assay kit, zone areas from an image of the kit are cropped, and the adapted  
84 network automatically and accurately interprets the bands at each zone and overall assay result.

85

86           In this study, we pre-trained a base model using expert-labelled images from the  
87   AssureTech EcoTest COVID-19 IgG/IgM Antibody Test, an assay authorized by FDA, and  
88   adapted the model to interpret LFAs from five other commercial COVID-19 LFAs (**Fig. 1b**).  
89   The five LFAs include three antigen tests (ACON Flowflex SARS-CoV-2 Antigen Rapid Test,  
90   Anhui DeepBlue SARS-CoV-2 Antigen Test, and Jinwofu SARS-CoV-2 Antigen Rapid Test),  
91   one antibody test (ACON SARS-CoV-2 IgG/IgM Antibody Test), and an AssureTech EcoTest  
92   COVID-19 IgG/IgM Antibody Test kit that uses a different housing (denoted in the paper as  
93   ‘EcoTest (housing 2)’) but retains use of the same LFA membrane (**Fig. 1b**). Like almost all  
94   commercial LFAs, these kits share rectangular control and test bands, but differ in kit housing  
95   dimensions and membrane dimensions, as well as number, spacing and color of bands (kit-  
96   specific dimensions shown in **Supplementary Table 1**). To illustrate the challenge for  
97   interpreting new assay kits, without few-shot adaptation, this pre-trained algorithm produced  
98   incorrect predictions (both false positives and false negatives) due to variations in color and  
99   intensities of bands and membranes across new LFA kits (**Fig. 1c**).

100

## 101   **Overview of pipeline**

102

103           In the AutoAdapt LFA algorithm (**Fig. 1d**), a user takes an image of an LFA kit, which  
104   enters a cloud-hosted pipeline with an instance-segmentation model that corrects the orientation  
105   and perspective of the raw image, segments the assay kit from background and the membrane  
106   from assay kit, and crops individual zones (i.e., regions in the membrane corresponding to bands  
107   and a portion of surrounding area) from the membrane. Next, images of zones enter a feature-  
108   extraction network, which is learned in order to generate robust feature representation as unique

109 signatures to discriminate positive cases from negative cases under diverse conditions (e.g.,  
110 color, intensity, and width of bands); the feature-extraction network also adapts to new LFA kits  
111 with a small number of images. From latent feature vectors for each zone, a binary classifier  
112 recognizes colored rectangular bands, the form factor seen in the vast majority of LFAs<sup>32,33</sup>, and  
113 determines whether a band is present or absent in each zone. Finally, an assessment of the LFA  
114 kit result is obtained by comparing the output of the binary classifier with a lookup table  
115 containing all combinations of possible zone-level classification results; this kit-level  
116 classification is sent to the user's smartphone as an interpreted LFA result. The server- hosted  
117 algorithm has a mean execution time of  $3.55 \pm 2.28$  seconds. Overall, this rapid automated  
118 interpretation pipeline could fit within a larger digital platform<sup>34-37</sup> that collects demographic  
119 data for epidemiology and provides instructions to carry out the test as well as follow-up linkage  
120 to care; **Supplementary Fig. 1**.

121  
122 To develop this pipeline, we framed the objective as learning the optimal parameters of  
123 the feature-extraction network and the classifier module by minimizing the loss functions given a  
124 set of training images for an assay kit. Unlike methods that require *de novo* training on a new  
125 LFA kit, we developed two novel methods to achieve adaptation requiring only a small number  
126 of images of new kits. First, to ensure the underlying feature representation is robust against  
127 variations in the LFA images, we developed a feature extractor that learns to extract robust latent  
128 representation of zone images for classification; these latent representations are also used to  
129 reconstruct (decode) the edges associated with the images. This auxiliary edge reconstruction  
130 task is in addition to the standard fully-supervised classification task and helps learn feature  
131 representation for effective adaptation, which is based on the observation that edges in an image  
132 tend to remain invariant in diverse LFA images. As shown in **Fig. 2a**, edge-preservation can be

133 learned in a self-supervised manner (not requiring manually-assigned labels), by using the output  
134 of an automatic edge detection algorithm (Sobel filter<sup>38</sup>) as the ground truth for decoding.

135 Second, as shown in **Fig. 2b**, our system performs supervised contrastive learning using a dataset  
136 combining images from the new LFA kit and the base LFA kit and learns a new classifier for the  
137 new kit. Here, the neural network model pre-trained on a set of labeled LFA images from the  
138 base kit is adapted to a new target LFA, using 10 to 20 labelled training images of a new kit.

139

## 140 **Image pre-processing**

141

142 For model training as well as during inference, the first module corrected for skew and  
143 extracted the zones from the images of LFA kit. This module first detected the orientation of the  
144 kit and carried out perspective correction using the predicted segmentation mask of the LFA kit  
145 (**Supplementary Fig. 2**). This mask was generated by using Mask R-CNN<sup>39</sup>, an instance  
146 segmentation model (more details in Methods). The kit membrane from the perspective corrected  
147 image was then localized and individual test zones were cropped out using the kit-specific  
148 dimensions listed in a JSON file. For this study, the test-specific dimensions, such as kit height,  
149 kit width, membrane width, membrane height, and zone dimensions, were measured from images  
150 of LFA kits using Adobe Photoshop v21.0.2 and saved as a JSON file. These dimensions could  
151 be directly provided by the kit manufacturers in the future. To measure the accuracy of the  
152 automatic membrane segmentation step, we measure the intersection over union (IoU) scores  
153 between the segmented membrane and the manually annotated ground-truth membrane region.  
154 IoU scores greater than 90% for all the assay kits (**Table 1**) confirm the robustness of this first  
155 step.

156

## 157 **Pre-training of feature extractor with edge detection and self-supervised learning**

158

159 The cropped test zones were fed into a feature extractor and the extracted features were  
160 passed into a binary classifier and a decoder (**Fig. 2a**). The binary classifier (a fully connected  
161 layer) outputs ‘0’ or ‘1’ to denote the absence or presence of the band in the cropped zone,  
162 respectively. The images from the base LFA kit were manually annotated with the binary labels,  
163 and the classifier was trained to learn specific prototypes associated with the positive and  
164 negative classes using cross-entropy (CE) loss.

165

166 Images of kits with faint bands can lead to false negatives while stained membranes and  
167 lighting artifacts can lead to false positives (**Fig. 1c**). Even though such failure cases can be  
168 reduced by training on a large number of relevant examples, acquiring sufficient images on a  
169 new LFA kit present a logistical challenge. Directly applying the model conventionally trained  
170 on the base LFA kit (i.e., by minimizing only the CE loss) to new LFA kits, resulted in low  
171 classification accuracy on the new kits. Hence, we designed a self-supervised, edge-enhanced  
172 image reconstruction task to improve the generalizability of the feature extractor (**Fig. 2a**). The  
173 network was trained to detect the edges of the image pattern (pixels at the junction between the  
174 membrane background and the band in the zone) and reconstruct the corresponding edge-  
175 enhanced image. This task is self-supervised: starting with RGB images of zones from a base  
176 LFA kit, the model converted the image into grayscale and applied a Sobel filter<sup>38</sup> to generate the  
177 ground truth image set (Sobel filter is a basic image processing algorithm that generates an  
178 image emphasizing edges). In parallel, the model fed the extracted features into the decoder to



179 reconstruct the edge-enhanced image. This model was then trained to minimize the mean  
180 squared error (MSE) between the reconstructed edge image from the decoder and the ground  
181 truth edge image. By combining the fully-supervised image classification with the self-  
182 supervised edge-enhanced image reconstruction, the feature extractor, classifier, and decoder  
183 were trained jointly to optimize the zone classification accuracy as well as to learn a good feature  
184 representation that is sensitive to edge information.

185

### 186 **Learning a new classifier for a new LFA using few-shot adaptation**

187

188 The pre-trained model from a base LFA kit was adapted to a new LFA kit with minimal  
189 retraining via few-shot adaptation (**Fig. 2b**). We mixed the labeled data of the base LFA kit and  
190 the new LFA kit and used this as the training set. We specifically used this mixture of data from  
191 new kit and base kit to avoid overfitting to the small number of images of the new kit. In  
192 addition to the CE loss used to train the binary classifier for the new LFA kit, we also used  
193 supervised contrastive learning, between the cropped zone images of both the new kit and the  
194 base kit, to refine the feature extractor.

195

196 We gathered the cropped zone images of both the base kit and the new kit, resampled the  
197 data, and calculated the supervised contrastive (SupCT) loss<sup>40</sup>. First, we extracted features of the  
198 base kit cropped zone images for both positive and negative classes and considered them as  
199 anchors. Next, we extracted features from the cropped zone images of the new kit and compared  
200 them with all of the anchors using cosine similarity. The feature extractor was then trained to  
201 maximize the cosine similarity between features of the same class. For the implementation, we

202 resampled the cropped zone images from the mixed dataset to build episodes and then computed  
203 SupCT loss within each episode (more details in Methods). As a comparison to the adaptation  
204 strategy, we also performed fine-tuning which only calculated the CE loss among samples within  
205 the episodes for network updating.

206

## 207 **Results**

208

### 209 **Description of datasets**

210

211 While gathering the image dataset, we varied imaging conditions by using different  
212 phones and imaging the assay kits under varied lighting conditions (more details in Methods).  
213 For pre-training of the model, the training dataset from the base kit (AssureTech EcoTest  
214 COVID-19 IgG/IgM Antibody Test) consisted of 383 membrane images (674 positive zones and  
215 475 negative zones). An additional 254 membrane images (441 positive zones and 254 negative  
216 zones) were used as the validation set for model selection under the fully-supervised  
217 classification task.

218

219 In addition, we used a variational autoencoder<sup>41</sup> to generate a synthetic dataset composed  
220 of 600 zones each of faint positive and negative zones<sup>42</sup>. The synthetic data was mixed with the  
221 training dataset for the self-supervised edge-reconstruction task.

222

223 The performance of base model is reported on an evaluation set consisting of 102  
224 membrane images (168 positive zones and 138 negative zones) of the base kit. The results  
225 (**Table 2**) demonstrate that our model works well for both zone-level classification and overall

226 kit-level classification on the base kit. A “zone-level” classification accuracy is the model’s  
227 performance on all the zones for the entire evaluation data set, and “kit-level” classification  
228 accuracy is the model’s performance in classifying all constituent zones of a single kit (e.g., a  
229 kit-level result would be incorrect if any zone in that kit was classified incorrectly). Details  
230 regarding the dataset for the five new kits are provided in **Supplementary Table 2**.

231

### 232 **Performance on 5 new COVID-19 tests**

233

234 We employed the pre-trained feature extractor using the few-shot adaptation strategy on  
235 five COVID-19 LFA kits, and assessed the effects of our adaptation strategy and self-supervised  
236 edge-detection task separately. The performance of the base model on the new kits are shown  
237 when applied directly and with the proposed adaptation method using 10-shots (20 zone images)  
238 highlighting the significant performance improvement seen using our few-shot adaptation  
239 strategy (**Table 2**). On top of the pretrained base model, adaptation can consistently improve the  
240 performance by including only a few training images of the new LFA kits. The EcoTest housing  
241 2 kit was identical in all aspects to the base kit except for the housing, so the direct application of  
242 the base model without any adaptation was able to achieve 100% zone-level and kit-level  
243 accuracies.

244

245 In **Fig. 3**, we plot the classification accuracy, at zone level and kit level, against the  
246 number of zone images used during the adaptation process, ranging from 0 (direct testing) to  
247 using the entire training dataset. These figures also serve as the ablation study evaluating the  
248 separate contributions made by self-supervision in pretraining the feature extractor as well as the  
249 supervised contrastive learning during adaptation. We compare our adaptation approach with

250 three alternative approaches: 1) the proposed approach without the self-supervision component  
251 in the pre-training stage, 2) the proposed approach without supervised contrastive loss during  
252 adaptation, and 3) training the network for a new kit from scratch without the two components.  
253 The second approach can be considered as a finetuning process that uses the pre-trained base  
254 model and finetunes it with the standard CE loss. For all approaches, the base kit and new kit  
255 images were mixed for network training, and the same data sampling strategy was used to ensure  
256 a fair comparison.

257  
258 For each kit, a random set of images of each class were selected from the training dataset  
259 for model adaptation and performance of the trained model was validated against a separate  
260 evaluation dataset. The plots for the different approaches are compared against the performance  
261 upper bound achieved when using all the new images available for training mixed with the base  
262 training images for the classification and edge reconstruction tasks. We showed that for each of  
263 the kits, Flowflex, DeepBlue, Jinwofu, and ACON IgG/IgM we achieved maximum  
264 classification accuracy using just 16, 14, 10, and 18 zone images respectively for the adaptation.  
265 For example, we were able to adapt the base model to the Flowflex kit (**Fig. 3a**) using only eight  
266 zone images per class (16 zone images) and reach the same performance (99.8% and 99.6% for  
267 the zone and kit levels respectively) as a model trained from scratch using all available training  
268 data (200 zone images). The results confirm that both self-supervised pretraining and supervised  
269 contrastive loss help, and the combination of these two key ideas helps reach the highest  
270 attainable performance. Between these two novel ideas, supervised contrastive learning is more  
271 effective: it requires fewer training images during adaptation in order to reach the performance  
272 upper bound that is achieved by using the entire training dataset.

273

274 In addition, as the feature extractor is pretrained under self-supervision, the extracted  
275 features are sensitive to the edges and can work well even when zones with faint bands are  
276 encountered. Even though the ACON IgG/IgM kit had the highest frequency of faint bands in  
277 our dataset, our approach was able to reach the same performance as using entire training dataset  
278 (**Fig. 3d**) using only nine images of each class (18 zone images). Adaptation without supervised  
279 contrastive learning can also reach the same performance using 40-shot adaptation. For the  
280 model trained without self-supervised pretraining 70 images (with SupCT loss) and 100 images  
281 (without SupCT loss) of each class were required to reach the best performance. In addition,  
282 direct testing performance (0-shot adaptation) of the model pretrained on the base kit was higher  
283 when trained using self-supervision than when trained using only the CE loss.

284

285 **Table 3** shows the confusion matrices of the performance of the optimum shot adaptation  
286 when evaluated on the evaluation dataset. By starting with a base model pretrained on an  
287 existing LFA kit (AssureTech EcoTest COVID-19 IgG/IgM antibody assay kit), we have shown  
288 that it is possible to adapt the existing model to different assay kits, which have different  
289 numbers of test lines and form factors, using a small fraction of the images needed to train the  
290 base model with no loss in accuracy. In addition to evaluating the confusion matrix among on  
291 samples in the evaluation set, we devised an ambiguity region to evaluate the distribution of  
292 detection scores (probability of positive class). The ambiguity region is bounded by the detection  
293 score thresholds such that an image will be correctly classified only if the probability of the  
294 ground truth class is high. The thresholds can be either manually set or statistically estimated  
295 with 95% area under the curve (more details in Methods). We checked the detection scores of all  
296 the images in the evaluation dataset against the ambiguity regions and those images with scores  
297 falling in ambiguity region were not classified. We computed the percentage of images that were

298 categorized as ambiguous as well as the accuracy over the images that were classified. Since the  
299 detection score for the false predictions were close to 0.5, they fell into the ambiguity region.  
300 Therefore, by using this concept of the ambiguity region we were able to treat most of the failure  
301 cases as ambiguous while keeping the number of true predictions that fell into the ambiguity  
302 region to a minimum. This further increased the classification accuracy among the classified  
303 samples consistently over four new target kits (**Table 3**).

304

### 305 **Conclusions and future work**

306

307 We have described the development of AutoAdapt LFA, an approach for the adaptation  
308 of a LFA kit interpretation model trained on one kit to new kits, each with a different form  
309 factor. We showed that this adaptation can be carried out using a much smaller subset of images  
310 than what was used for training the base model. Compared to *de novo* training on every new  
311 assay kit, this reduction in the number of images was achieved by adopting a modular approach  
312 to the machine-learning pipeline: starting from an image of the kit, the perspective-corrected  
313 membrane and individual zones were extracted followed by the extraction of the features  
314 preserving edge information, and finally a binary output which indicated whether a band was  
315 present in the cropped zone. A robust feature extractor is important for handling challenging  
316 images in LFA kits like those with faint or partially formed lines. Our approach of using self-  
317 supervision to extract features preserving edge information addressed this issue, and it is  
318 believed that this use of self-supervised learning to reconstruct edge-enhanced images has not  
319 been previously demonstrated. To our knowledge, the application few-shot learning, including  
320 this adaptation framework, has not been demonstrated for interpretation of LFA kit images.

321 Thus, we have shown that using this novel approach, we can train accurate classification models  
322 using a fraction of kit images that would be required in *de novo* training.

323  
324 In terms of impact for medicine, this reduction in new training images to achieve assured  
325 user interpretation of rapid test images is significant with the rise of use of rapid diagnostic tests.  
326 Most immediately, the COVID-19 pandemic has thrust front and forward the need for rapid  
327 testing and population surveillance to track and control the spread of the disease in a scalable and  
328 timely manner. If effectively implemented, point-of-care testing can contribute significantly to a  
329 rapid and effective public health response – as well as patients’ individual safety, privacy,  
330 physical health and mental well-being – by enabling widespread timely testing in a manner that  
331 does not overwhelm the limited capacity of testing facilities or provoke social crowding at  
332 selected testing sites. By expediting the process of training a model to newly available rapid  
333 diagnostic tests, the AutoAdapt LFA approach could facilitate reliable decentralized testing and  
334 real-time monitoring of disease prevalence. In the longer term, the need to achieve assured user  
335 interpretation will rise as patients and consumers will more frequently monitor their health via  
336 self-testing for both infectious diseases and chronic conditions, in an age of precision health.  
337 Future work includes validation on a wider variety of rapid tests, and generalization to LFA kits  
338 beyond rectangular bands (for example, as in some vertical flow assays) and bands of single  
339 colors (for example, some urinalysis kits with color-based readouts).

340 **Methods**

341

342 **Dataset Collection**

343 Base kit (AssureTech EcoTest COVID-19 IgG/IgM Antibody Test): train and validation  
344 datasets were gathered using iPhone X at the Mayo Clinic Hospital, Phoenix, AZ. The evaluation  
345 dataset images were gathered using three phones by two users: iPhone X, iPhone 7, Samsung  
346 Galaxy J3 (SM-J337V). Care was taken to ensure that the kits were imaged under three different  
347 ambient lighting conditions (warm white, cool white, and daylight).

348

349 Novel kits (ACON Flowflex SARS-CoV-2 Antigen Rapid Test, Anhui DeepBlue SARS-CoV-2  
350 Antigen Test, Jinwofu SARS-CoV-2 Antigen Rapid Test, and ACON SARS-CoV-2 IgG/IgM  
351 Antibody Test ): training and evaluation sets were gathered using iPhone X at the Mayo Clinic  
352 Hospital, Phoenix, AZ. Serum samples for the antibody tests were collected under Mayo Clinic  
353 IRB 20-004544 or shared by the Department of Laboratory Medicine at the University of  
354 Washington School of Medicine (Seattle, WA)<sup>43</sup>. The use of excess clinical specimens was  
355 reviewed by the Mayo Clinic Biospecimens Committee and an appropriate Material Transfer  
356 Agreement was drawn up to allow access to de-identified specimens from the University of  
357 Washington School of Medicine. The University of Washington IRB approved this work with a  
358 consent waiver. Nasopharyngeal swabs from Mayo Clinic Hospital patients were heat fixed and  
359 run for the antigen tests under Mayo Clinic IRB 20-010688. All necessary patient/participant  
360 consent has been obtained and the appropriate institutional forms have been archived.

361 All assay kits were imaged within 10 minutes of running the test.

362



## 363 **Image acquisition and pre-processing based on Mask R-CNN**

364 The image processing workflow starts with an image of the assay kit being taken by the  
365 user through the SMARTtest application<sup>18</sup> in a fixed portrait orientation. This image is saved in  
366 an AWS S3 bucket as a JPEG image from the frontend, and the corresponding URL is sent to  
367 the AWS Lambda Function. The function reads the image data, stores the original resolution  
368 image in a copy, and resizes the image while preserving the aspect ratio by capping the height of  
369 the image to a maximum of 800 pixels. The membrane is localized in the resized image using the  
370 instance segmentation model Mask RCNN (**Supplementary Fig. 2**), and the predicted bounding  
371 box coordinates in the resized image are then transformed to the corresponding coordinates in the  
372 image of the original resolution to get the highest possible resolution of the membrane which is  
373 then sent to the classifier.

374  
375 Mask R-CNN<sup>39</sup> builds on top of the preceding Faster R-CNN<sup>44</sup> and Fast R-CNN<sup>45</sup> models  
376 and combines them with a fully-convolutional network (FCN) and introduces object mask  
377 prediction (i.e., segmentation<sup>46</sup>) in parallel to bounding box regression. Given an input image, the  
378 model extracts feature maps via a pretrained deep neural network (e.g., VGG16), and  
379 subsequently passes these in parallel through a ROI-specialized pooling layer followed by  
380 several fully-connected layers and an FCN. The instance segmentation model has been trained  
381 for two object classes: the kit and the membrane. The model outputs i) detection scores, ii)  
382 bounding boxes, and iii) segmentation masks of a maximum of 100 objects. The bounding box  
383 defines a rectangular area that contains the assay kit or the membrane. The segmentation mask  
384 includes all the pixels that correspond to the actual area of the assay kit or the membrane and do  
385 not necessarily have to be rectangular in shape. From all the detected objects we retain

386 information for a kit and membrane object with the highest detection score greater than 0.9.

387 **Supplementary Fig. 3** illustrates different IoU scores and the corresponding membrane  
388 segmentation masks for the EcoTest (base kit).

389

390 The bounding boxes and segmentation masks of the kit and membrane with the highest  
391 detection score are retrieved and a binary segmentation mask is generated for both kit and  
392 membrane. Next, the rotation angle is estimated by performing contour detection on the  
393 segmentation mask of the kit and membrane, and approximating a minimum-area quadrilateral  
394 mask whose corner coordinates can be used to construct a right-angle triangle. The membrane is  
395 cropped from the input image with the binary segmentation mask, and is subsequently rotated by  
396 the estimated angle. The rotated membrane will have black regions if the estimated angle is  
397 greater than zero, and the largest rectangle that doesn't include any black pixels is estimated and  
398 extracted as the final membrane to be sent to the classifier. Additionally, we have the capability  
399 to compute the homography matrix<sup>47</sup> between the predicted segmentation mask and bounding  
400 box of the kit, and use it to transform the kit of the image to correct for distortion along the pitch  
401 axis.

402

### 403 **Pre-training with self-supervised learning**

404

405 The model uses the Mean Squared Error (MSE) between the decoder output (the  
406 reconstructed image) and the ground truth edge-enhanced image as the loss. For the base kit, the  
407 number of labeled images were sufficient so that both the classification and the edge-enhanced  
408 image reconstruction tasks were carried out to learn a good feature extractor. Thus, as shown in

409 **Fig. 2a** output features of each cropped zone are sent to both the classifier and the decoder. The  
410 model uses the cross-entropy (CE) loss for the classification task and uses the MSE between the  
411 reconstruction and the automatically reconstructed edge filtered image to learn the optimal  
412 convolution kernel in the decoder for the self-supervised edge reconstruction task. By using the  
413 edge-enhanced features, the feature extractor was able to generalize well on new assay kit  
414 images even if the zones were faint.

415

416 To generate the ground-truth of the self-supervision task, the model first converted the  
417 RGB image into a grayscale image, and then performed edge filtering using Sobel filtering to  
418 highlight the pixels in the edge region (if an edge exists). The edge filtered images are then  
419 normalized between 0 and 1 and set as labels for the self-supervision task.

420

421 With the annotated classification label and the self-generated edge detection label, the  
422 equally weighted CE loss and MSE were summed up and used as the objective. In this manner,  
423 the extracted features were made sensitive to the edge region and the encoded edge information  
424 was used for the classification of cropped zone images including those with faint bands.

425

## 426 **Hyperparameter Selection**

427

428 *Instance segmentation model structure:*

429 We used the ResNet50 CNN as the backbone of the Mask R-CNN and pretrained it on  
430 the ImageNet1K dataset for model initialization. The backbone has been trained on ImageNet1K

431 as a fully-supervised image classification task among 1,000 classes. We used a hidden layer size  
432 of 256 for the mask predictor.

433

434 *Instance segmentation training:*

435 We used 50 epochs and Adam optimizer for all of the training processes. We pretrained  
436 the model on a training subset of 50 images of the base kit with a learning rate of 5E-5 and  
437 achieved an IOU score of 0.93 on an evaluation set of ten images. We then finetuned the model  
438 on the new assay kits with a learning rate of 5E-6 using 10 training images and evaluated the  
439 performance on 10 evaluation images. We used the following train-time augmentations: (i)  
440 horizontal flip, (ii) scaling, (iii) aspect-ratio modification, (iv) brightness adjustment, (v) contrast  
441 adjustment, (vi) hue adjustment, (vii) saturation adjustment, (viii) color distortion, (ix) jitter  
442 addition, (x) cropping, (xi) padding, and (xii) Gaussian noise addition. **Supplementary Table 3**  
443 shows the results from the test of robustness of the instance segmentation model using  
444 bootstrapping.

445

446 *Classification model structure:*

447 We used the ResNet18 CNN as the feature extractor and pretrained the model on the  
448 ImageNet1K dataset for model initialization<sup>48</sup>. The feature extractor has been trained on  
449 ImageNet1K as a fully-supervised image classification task among 1,000 classes. As shown in  
450 **Fig. 2a**, during the pretraining on base kit images, classifier is configured as a fully connected  
451 layer (top output) and the decoder is configured as a stack of three deconvolution layers (bottom  
452 output).

453

454 *Classification model pre-training:*

455         Given a training set, all the images were fed into the model in sequence and the loss was  
456 calculated for both gradient backpropagation and for updating the model. A single epoch is  
457 completed when the model has seen all the images once. 90 epochs were run in our training  
458 process. The performance of the model on the validation dataset was determined after each  
459 epoch and the model achieving the highest accuracy was selected.

460

461 *Classification model adaptation & finetuning:*

462         The network was trained for 100 epochs for each of the new kits with a learning rate of  
463 0.001. Within each epoch, we sample 30 episodes and set Q (number of samples per class) as 32  
464 for each episode. The feature extractor was tuned with a learning rate of 0.0001. Adam optimizer  
465 was used for the network parameter update of both the feature extractor and the classifier. The  
466 inbuilt PyTorch image transformation functions were used, namely: 1) horizontal flip, 2)  
467 Random Rotation, 3) Color Jitter (including grayscale). **Supplementary Table 4** shows the  
468 results from the test of robustness of the adapted model on the 4 new test kits using  
469 bootstrapping.

470

471 *Classification model training from scratch:*

472         Similar to the initialization step before self-supervision, a ResNet18 CNN is used as the  
473 feature extractor which has been trained with the ImageNet1K dataset as a fully-supervised  
474 image classification task. The network is then trained on the training images of the new assay kit  
475 with Adam optimizer and a learning rate of 0.001. The same transformation functions used for  
476 the adaptation were used here.

477

## 478 **Threshold Determination and Ambiguity Region**

479

480 In general, the thresholds ( $\delta_{neg}$ ,  $\delta_{pos}$ ) for negative class and positive class were determined  
481 individually by feeding the detection score (probability of positive,  $P_{pos}$ ) of all images of each  
482 class into the statistical model and fitting separately. Using the threshold determination of  
483 positive class as an example, the steps are explained below:

484 1) Select the Inverse Gaussian Distribution as the model template to be fitted<sup>49,50</sup>. The  
485 reasons why we select this one-side distribution model are,

486 a. The inverse gaussian distribution is used to model variables of non-negative  
487 values.

488 b. Since the probability output from the model is between 0 and 1, the inverse  
489 gaussian distribution is selected as it is tighter within the range [0,1] (i.e., the area  
490 under its probability density function (PDF) curve within [0,1] is closer to one),  
491 compared to other distribution models such as Gamma distribution which may  
492 have an observable tail in [1, infinity) interval.

493 2) Feed the  $P_{pos}$  of all labelled positive zone images into the statistical model and use the  
494 fitted parameters to draw the PDF curve.

495 3) We set the area under the probability distribution curve (between the threshold and the  
496 extreme value, i.e., 1 for positive and 0 for negative) as 95% and use Divide and Conquer  
497 to find the corresponding threshold value  $\delta$ , which is threshold for positive class  $\delta_{pos}$ .

498

499 For a negative class,  $P_{pos}$  is still used as input to find the classification score threshold  $\delta_{neg}$ .  
500 For the convenience of presentation,  $[\delta_{neg}, \delta_{pos}]$  is used to denote the ambiguity region where  
501 images with  $\delta_{neg} \leq P_{pos} \leq \delta_{pos}$  will not be classified since they fall within the region, and the  
502 images with  $P_{pos} \leq \delta_{neg}$  or  $P_{pos} \geq \delta_{pos}$  are classified as negative or positive respectively. The  
503 ratio of the unclassified images with respect to the entire evaluation set is reported as the  
504 percentage of ambiguous cases (as shown in **Table 3**).

505  
506 **References**

- 507  
508 1 Posthuma-Trumpie, G. A., Korf, J., van Amerongen, A. J. A. & chemistry, b. Lateral  
509 flow (immuno) assay: its strengths, weaknesses, opportunities and threats. A literature  
510 survey. **393**, 569-582 (2009).
- 511 2 Andryukov, B. G. J. A. M. Six decades of lateral flow immunoassay: from determining  
512 metabolic markers to diagnosing COVID-19. **6**, 280-304 (2020).
- 513 3 Ibitoye, M., Frasca, T., Giguere, R., Carballo-Diéguez, A. J. A. & Behavior. Home  
514 testing past, present and future: lessons learned and implications for HIV home tests. **18**,  
515 933-949 (2014).
- 516 4 Koczula, K. M. & Gallotta, A. Lateral flow assays. *Essays in biochemistry* **60**, 111-120  
517 (2016).
- 518 5 Carrio, A., Sampedro, C., Sanchez-Lopez, J. L., Pimienta, M. & Campoy, P. Automated  
519 low-cost smartphone-based lateral flow saliva test reader for drugs-of-abuse detection.  
520 *Sensors-Basel* **15**, 29569-29593 (2015).

- 521 6 Ghani, A. C., Burgess, D. H., Reynolds, A. & Rousseau, C. Expanding the role of  
522 diagnostic and prognostic tools for infectious diseases in resource-poor settings. *Nature*  
523 **528**, S50-52, doi:10.1038/nature16038 (2015).
- 524 7 FDA. *In Vitro Diagnostics EUAs - Antigen Diagnostic Tests for SARS-CoV-2*,  
525 <[https://www.fda.gov/medical-devices/coronavirus-disease-2019-covid-19-emergency-](https://www.fda.gov/medical-devices/coronavirus-disease-2019-covid-19-emergency-use-authorizations-medical-devices/in-vitro-diagnostics-euas-antigen-diagnostic-tests-sars-cov-2)  
526 [use-authorizations-medical-devices/in-vitro-diagnostics-euas-antigen-diagnostic-tests-](https://www.fda.gov/medical-devices/in-vitro-diagnostics-euas-antigen-diagnostic-tests-sars-cov-2)  
527 [sars-cov-2](https://www.fda.gov/medical-devices/in-vitro-diagnostics-euas-antigen-diagnostic-tests-sars-cov-2)> (2021).
- 528 8 Ballard, Z. S. *et al.* Deep learning-enabled point-of-care sensing using multiplexed paper-  
529 based sensors. **3**, 1-8 (2020).
- 530 9 Joung, H.-A. *et al.* Point-of-care serodiagnostic test for early-stage lyme disease using a  
531 multiplexed paper-based immunoassay and machine learning. **14**, 229-240 (2019).
- 532 10 Contreras-Naranjo, J. C., Wei, Q. & Ozcan, A. J. I. J. o. S. T. i. Q. E. Mobile phone-  
533 based microscopy, sensing, and diagnostics. **22**, 1-14 (2015).
- 534 11 Kong, J. E. *et al.* Highly Stable and Sensitive Nucleic Acid Amplification and Cell-  
535 Phone-Based Readout. *Acs Nano* **11**, 2934-2943, doi:10.1021/acsnano.6b08274 (2017).
- 536 12 Potluri, V. *et al.* An inexpensive smartphone-based device for point-of-care ovulation  
537 testing. **19**, 59-67 (2019).
- 538 13 Shah, K. G., Singh, V., Kauffman, P. C., Abe, K. & Yager, P. J. A. c. Mobile phone  
539 ratiometric imaging enables highly sensitive fluorescence lateral flow immunoassays  
540 without external optical filters. **90**, 6967-6974 (2018).
- 541 14 Dell, N. & Borriello, G. in *Proceedings of the 3rd ACM Symposium on Computing for*  
542 *Development*. 1-10.



- 543 15 Ruppert, C., Phogat, N., Laufer, S., Kohl, M. & Deigner, H.-P. J. M. A. A smartphone  
544 readout system for gold nanoparticle-based lateral flow assays: application to monitoring  
545 of digoxigenin. **186**, 119 (2019).
- 546 16 Dell, N. L., Venkatachalam, S., Stevens, D., Yager, P. & Borriello, G. in *Proceedings of*  
547 *the 5th ACM workshop on Networked systems for developing regions*. 3-8.
- 548 17 Draz, M. S. *et al.* Virus detection using nanoparticles and deep neural network-enabled  
549 smartphone system. *Sci Adv* **6**, doi:10.1126/sciadv.abd5354 (2020).
- 550 18 Balán, I. C. *et al.* SMARTtest: A Smartphone App to Facilitate HIV and Syphilis Self-  
551 and Partner-Testing, Interpretation of Results, and Linkage to Care. *AIDS and Behavior*,  
552 1-14 (2019).
- 553 19 Aveyard, J., Mehrabi, M., Cossins, A., Braven, H. & Wilson, R. J. C. c. One step visual  
554 detection of PCR products with gold nanoparticles and a nucleic acid lateral flow  
555 (NALF) device. 4251-4253 (2007).
- 556 20 Parolo, C. *et al.* Tutorial: design and fabrication of nanoparticle-based lateral-flow  
557 immunoassays. **15**, 3788-3816 (2020).
- 558 21 Millipore, E. J. E. M. C. B., MA, USA. Rapid lateral flow test strips: Considerations for  
559 product development. **29**, 702-707 (2013).
- 560 22 Yetisen, A. K., Akram, M. S. & Lowe, C. R. Paper-based microfluidic point-of-care  
561 diagnostic devices. *Lab Chip* **13**, 2210-2251, doi:10.1039/c3lc50169h (2013).
- 562 23 Huang, X. & El-Sayed, M. A. J. J. o. a. r. Gold nanoparticles: Optical properties and  
563 implementations in cancer diagnosis and photothermal therapy. **1**, 13-28 (2010).
- 564 24 Lake, B. M., Salakhutdinov, R. & Tenenbaum, J. B. J. S. Human-level concept learning  
565 through probabilistic program induction. **350**, 1332-1338 (2015).

- 566 25 Wang, Y., Yao, Q., Kwok, J. T. & Ni, L. M. J. A. C. S. Generalizing from a few  
567 examples: A survey on few-shot learning. **53**, 1-34 (2020).
- 568 26 Wu, Y. & Demiris, Y. in *2010 IEEE International Conference on Robotics and*  
569 *Automation*. 2889-2894 (IEEE).
- 570 27 Snell, J., Swersky, K. & Zemel, R. in *Advances in neural information processing systems*.  
571 4077-4087.
- 572 28 Kang, B. *et al.* in *Proceedings of the IEEE International Conference on Computer Vision*.  
573 8420-8429.
- 574 29 Wang, Y.-X., Ramanan, D. & Hebert, M. in *Proceedings of the IEEE International*  
575 *Conference on Computer Vision*. 9925-9934.
- 576 30 Sun, Q., Liu, Y., Chua, T.-S. & Schiele, B. in *Proceedings of the IEEE conference on*  
577 *computer vision and pattern recognition*. 403-412.
- 578 31 Wang, Y.-X. & Hebert, M. in *European Conference on Computer Vision*. 616-634  
579 (Springer).
- 580 32 Sajid, M., Kawde, A.-N. & Daud, M. J. J. o. S. C. S. Designs, formats and applications of  
581 lateral flow assay: A literature review. **19**, 689-705 (2015).
- 582 33 Bahadır, E. B. & Sezgintürk, M. K. J. T. T. i. A. C. Lateral flow assays: Principles,  
583 designs and labels. **82**, 286-306 (2016).
- 584 34 Budd, J. *et al.* Digital technologies in the public-health response to COVID-19. *Nat Med*  
585 **26**, 1183-1192, doi:10.1038/s41591-020-1011-4 (2020).
- 586 35 Wood, C. S. *et al.* Taking connected mobile-health diagnostics of infectious diseases to  
587 the field. *Nature* **566**, 467-474, doi:10.1038/s41586-019-0956-2 (2019).

- 588 36 Whitelaw, S., Mamas, M. A., Topol, E. & Van Spall, H. G. J. T. L. D. H. Applications of  
589 digital technology in COVID-19 pandemic planning and response. (2020).
- 590 37 Murray, C. J., Alamro, N. M. S., Hwang, H. & Lee, U. J. T. L. P. H. Digital public health  
591 and COVID-19. **5**, e469-e470 (2020).
- 592 38 Kittler, J. J. I. & Computing, V. On the accuracy of the Sobel edge detector. **1**, 37-42  
593 (1983).
- 594 39 He, K., Gkioxari, G., Dollar, P. & Girshick, R. Mask R-CNN. *IEEE Trans Pattern Anal  
595 Mach Intell* **42**, 386-397, doi:10.1109/TPAMI.2018.2844175 (2020).
- 596 40 Khosla, P. *et al.* Supervised contrastive learning. (2020).
- 597 41 Kingma, D. P. & Welling, M. J. a. p. a. Auto-encoding variational bayes. (2013).
- 598 42 Wan, Z., Zhang, Y. & He, H. in *2017 IEEE symposium series on computational  
599 intelligence (SSCI)*. 1-7 (IEEE).
- 600 43 McAulay, K. *et al.* Retrospective clinical evaluation of 4 lateral flow assays for the  
601 detection of SARS-CoV-2 IgG. **98**, 115161 (2020).
- 602 44 Ren, S., He, K., Girshick, R. & Sun, J. Faster R-CNN: Towards Real-Time Object  
603 Detection with Region Proposal Networks. *IEEE Trans Pattern Anal Mach Intell* **39**,  
604 1137-1149, doi:10.1109/TPAMI.2016.2577031 (2017).
- 605 45 Girshick, R. in *Proceedings of the IEEE international conference on computer vision*.  
606 1440-1448.
- 607 46 Minaee, S. *et al.* Image segmentation using deep learning: A survey. (2021).
- 608 47 Geetha Kiran, A. & Murali, S. J. J. C. S. A. Automatic rectification of perspective  
609 distortion from a single image using plane homography. **3**, 47-58 (2013).

610 48 Deng, J. *et al.* in *2009 IEEE conference on computer vision and pattern recognition*.  
611 248-255 (Ieee).  
612 49 Folks, J. L. & Chhikara, R. S. J. J. o. t. R. S. S. S. B. The inverse Gaussian distribution  
613 and its statistical application—a review. **40**, 263-275 (1978).  
614 50 Chhikara, R. *The inverse Gaussian distribution: theory: methodology, and applications*.  
615 Vol. 95 (CRC Press, 1988).

616

## 617 **Acknowledgements**

618  
619 We thank Ken Mayer for his involvement in the coordination of the study. Assay kits  
620 were kindly provided to Mayo Clinic for evaluations from Acon, Paramount (DeepBlue and  
621 Jinwofu), EcoTest (EcoTest Housing 2), and BTNX (EcoTest Housing 1). The work was  
622 supported by Herbert Irving Comprehensive Cancer Center in partnership with the Irving  
623 Institute for Clinical and Translational Research via a SARS-CoV-2 Research Pilot Grant,  
624 Columbia University School of Engineering and Applied Science via a Technology Innovations  
625 for Urban Living in the Face of COVID-19 Pilot Grant, and a gift from Bing Zhao.

626

627

628

## 629 **Author contributions**

630

631

632 S.A., U.M., and S.K.S., conceptualized the initial project. S.A., J.M, S.C., and S.K.S.  
633 supervised the project. U.M. developed the object detection module. J.M., G.H., and S.C.  
634 developed the feature extractor and few-shot adaptation modules. D.I. and U.M. worked on  
635 cloud architecture and model hosting. A.Y. developed an image-labelling dashboard. D.C.

636 developed the workflow to record kit parameters. S.A., J.M., U.M., S.C., and S.K.S. analyzed the  
637 data. K.M. and T.G. tested the assay kits with clinical samples and acquired smartphone images.  
638 R.S. helped label images for object detection. S.A., J.M., U.M., S.C., and S.K.S. wrote the  
639 manuscript.

640  
641

#### 642 **Competing interests**

643

644 A version of this algorithm has been licensed by Columbia University to Safe Health  
645 Systems, Inc.

646

#### 647 **Author Declarations**

648 I confirm all relevant ethical guidelines have been followed, and any necessary IRB and/or ethics  
649 committee approvals have been obtained.

650 Yes

651 The details of the IRB/oversight body that provided approval or exemption for the research  
652 described are given below:

653 Serum samples for the antibody tests were collected under Mayo Clinic IRB 20-004544 or  
654 shared by the Department of Laboratory Medicine at the University of Washington School of  
655 Medicine (Seattle, WA). The use of excess clinical specimens was reviewed by the Mayo Clinic  
656 Biospecimens Committee and an appropriate Material Transfer Agreement was drawn up to  
657 allow access to de-identified specimens from the University of Washington School of Medicine.

658 The University of Washington IRB approved this work with a consent waiver. Nasopharyngeal  
659 swabs from Mayo Clinic Hospital patients were heat fixed and run for the antigen tests under  
660 Mayo Clinic IRB 20-010688.

661

662 All necessary patient/participant consent has been obtained and the appropriate institutional  
663 forms have been archived.

664 Yes

665 I understand that all clinical trials and any other prospective interventional studies must be  
666 registered with an ICMJE-approved registry, such as ClinicalTrials.gov. I confirm that any such  
667 study reported in the manuscript has been registered and the trial registration ID is provided  
668 (note: if posting a prospective study registered retrospectively, please provide a statement in the  
669 trial ID field explaining why the study was not registered in advance).

670 n/a

671 I have followed all appropriate research reporting guidelines and uploaded the relevant  
672 EQUATOR Network research reporting checklist(s) and other pertinent material as  
673 supplementary files, if applicable.

674 Yes

675 **Tables**

676

| <b>Kit name</b>   | <b>IOU score</b> |
|-------------------|------------------|
| Flowflex          | 0.92             |
| DeepBlue          | 0.89             |
| Jinwofu           | 0.90             |
| ACON IgG/IgM      | 0.93             |
| EcoTest housing 2 | 0.93             |

677

678 **Table 1. Intersection over Union scores for membrane segmentation.** The IOU scores for  
679 each of the new kit images was obtained by selecting ten images at random from a labelled pool  
680 of 30 images for training and evaluating the performance on a fixed evaluation set of ten images.

681

682

683

684

685

686

687

688

689

690

691

| Kit name          | Without adaptation |                  | With adaptation   |                  |
|-------------------|--------------------|------------------|-------------------|------------------|
|                   | Zone accuracy (%)  | Kit accuracy (%) | Zone accuracy (%) | Kit accuracy (%) |
| EcoTest (base)    | 98.8               | 96.5             | -                 | -                |
| Flowflex          | 93.1               | 86.1             | 99.8              | 99.6             |
| DeepBlue          | 93.2               | 86.4             | 99.5              | 98.9             |
| Jinwofu           | 94.7               | 89.4             | 100               | 100              |
| ACON IgG/IgM      | 91.0               | 73.6             | 98.8              | 96.4             |
| EcoTest housing 2 | 100                | 100              | -                 | -                |

692

693 **Table 2. Zone-level and kit-level classification accuracy without adaptation (direct testing)**

694 **and with adaptation.** For the direct testing case, the model pretrained on the base kit was

695 directly applied on each of the new kit's evaluation dataset. For the adaptation approach, the

696 pretrained model was adapted to each of the new kits, except for EcoTest housing 2 kit, using

697 10-shot adaptation (20 zone images) and the performance on their respective evaluation datasets

698 is listed here.

699

700

701

702

703

704

705

706



707 **a) EcoTest (base kit)**

| Prediction \ Label | Positive | Negative |
|--------------------|----------|----------|
| Positive           | (TP) 165 | (FP) 1   |
| Negative           | (FN) 3   | (TN) 137 |

708

709 **b) Flowflex (2-zone kit; 224 zone images)**

| Prediction \ Label | Positive | Negative | Ambiguity Region          | [0.50, 0.50] | [0.08, 0.98] | [0.20, 0.80] |
|--------------------|----------|----------|---------------------------|--------------|--------------|--------------|
| Positive           | (TP) 303 | (FP) 0   | Accuracy                  | 99.8%        | 100%         | 100%         |
| Negative           | (FN) 1   | (TN) 142 | Percentage ambiguous kits | -            | 5.2%         | 1.3%         |

710

711 **c) DeepBlue (2-zone kits; 184 zone images)**

| Prediction \ Label | Positive | Negative | Ambiguity Region          | [0.50, 0.50] | [0.21, 0.95] | [0.20, 0.80] |
|--------------------|----------|----------|---------------------------|--------------|--------------|--------------|
| Positive           | (TP) 242 | (FP) 0   | Accuracy                  | 99.5%        | 100%         | 100%         |
| Negative           | (FN) 2   | (TN) 124 | Percentage ambiguous kits | -            | 4.9%         | 4.1%         |

712

713 **d) Jinwofu (2-zone kits; 104 zone image)**

| Prediction \ Label | Positive | Negative | Ambiguity Region          | [0.50, 0.50] | [0.05, 0.99] | [0.20, 0.80] |
|--------------------|----------|----------|---------------------------|--------------|--------------|--------------|
| Positive           | (TP) 164 | (FP) 0   | Accuracy                  | 100%         | 100%         | 100%         |
| Negative           | (FN) 0   | (TN) 44  | Percentage ambiguous kits | -            | 1.4%         | 0            |

714

715 **e) ACON IgG/IgM (3-zone kits; 193 zone images)**

| Label<br>Prediction | Positive | Negative | Ambiguity<br>Region             | [0.50,<br>0.50] | [0.11,<br>0.88] | [0.20,<br>0.80] |
|---------------------|----------|----------|---------------------------------|-----------------|-----------------|-----------------|
| Positive            | (TP) 386 | (FP) 1   | Accuracy                        | 98.8%           | 99.5%           | 99.3%           |
| Negative            | (FN) 6   | (TN) 192 | Percentage<br>ambiguous<br>kits | -               | 3.5%            | 2.8%            |

716

717 **f)** EcoTest housing 2 (3-zone kits; 24 zone image).

| Label<br>Prediction | Positive | Negative |
|---------------------|----------|----------|
| Positive            | (TP) 66  | (FP) 0   |
| Negative            | (FN) 0   | (TN) 6   |

718

719 **Table 3. Confusion matrices of the best models applied on the evaluation dataset (left)**

720 **Accuracy and the percentage of ambiguous kits across varying ambiguity regions (right)**

721 **(a)** is the confusion matrix for the base model on base kit evaluation set. The performance of the  
 722 best performing adapted model on the evaluation dataset for each of the new kits **(b – e)** without  
 723 the enforcement of an ambiguity region is shown in the tables to the left. **(f)** shows the confusion  
 724 matrix for the EcoTest housing 2 kit. The tables on the right show the accuracy for the  
 725 corresponding assay kit and percentage of kits classified as ambiguous values for the different  
 726 kits when varying the ambiguity region.

727

728

729

730

731 **Figures**

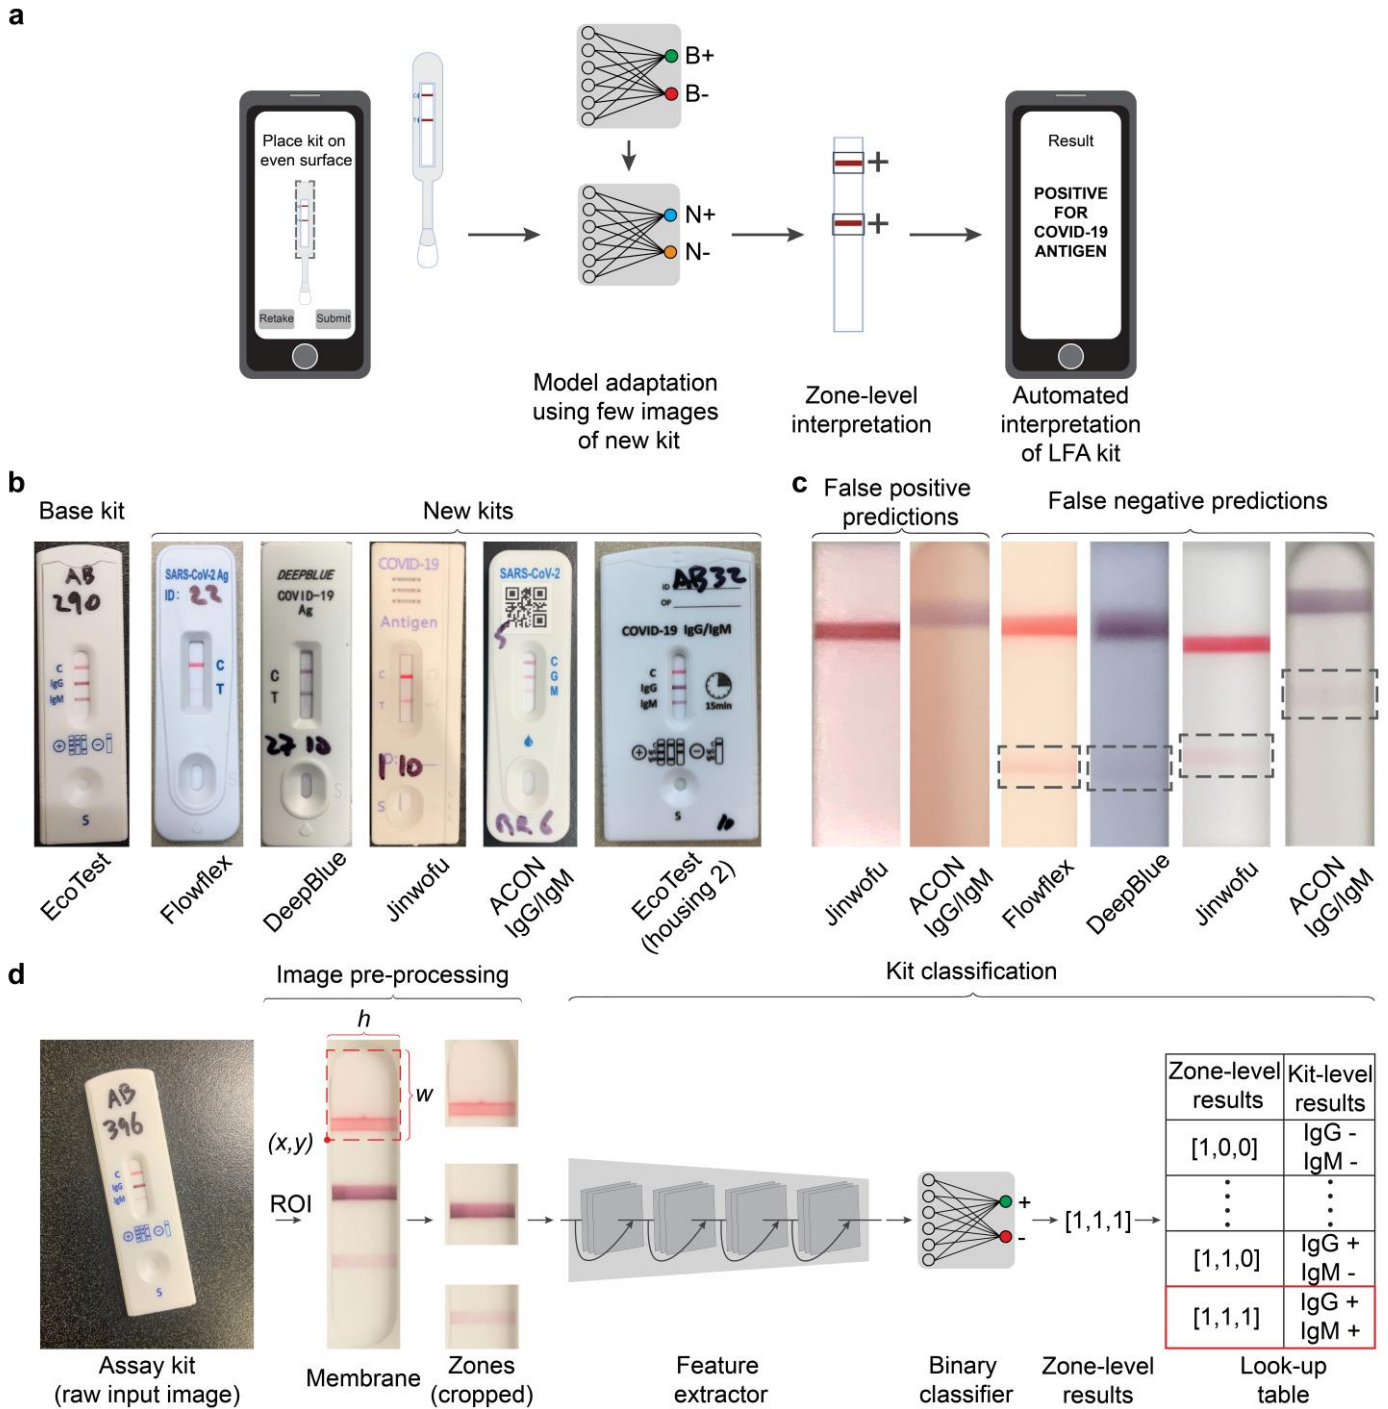

732

733 **Figure 1. Overview of use case, challenge, and pipeline for image processing and machine**

734 **learning.** (a) Envisioned testing process for end user. The user takes an image of the assay kit

735 using a smartphone displaying an on-screen image guide. The zones containing the bands are  
736 automatically identified, and a model that was pre-trained on a base kit (shown as “B” in the  
737 network) and previously rapidly adapted to a new kit (using few-shot learning, shown as “N” in  
738 the network) processes the images of zones. The model classifies each zone as positive or  
739 negative, and provides an overall assay result on the screen of the smartphone. The cloud-hosted  
740 model processes the image and generates the results in ~4 seconds. **(b)** Images of a base LFA kit  
741 (EcoTest) for pre-training the model, and five new COVID-19 LFA kits (including both antigen  
742 and antibody tests) to be interpreted. **(c)** Images illustrating the challenge for few-shot learning.  
743 A pre-trained model on the base kit, without adaptation, produces failed predictions on the new  
744 kits. Shown are both false positives and false negatives (likely due to variations in colors and  
745 intensities of membrane background and bands). **(d)** Overview of AutoAdapt LFA pipeline.  
746 From a raw input image of an assay kit, a correction of orientation and perspective is applied to  
747 segment an image of an assay kit. From the assay kit image, a segmentation model based on  
748 Mask R-CNN is used to extract the membrane region of interest (RoI). Based on measured kit-  
749 specific parameters, individual zones are cropped, and passed through a software pipeline  
750 consisting of a feature extractor followed by a binary classifier. Classification of each zone  
751 allows, via a kit-specific lookup table, for a final classification of assay result (“kit-level”  
752 classification or result) as positive, negative, or invalid.

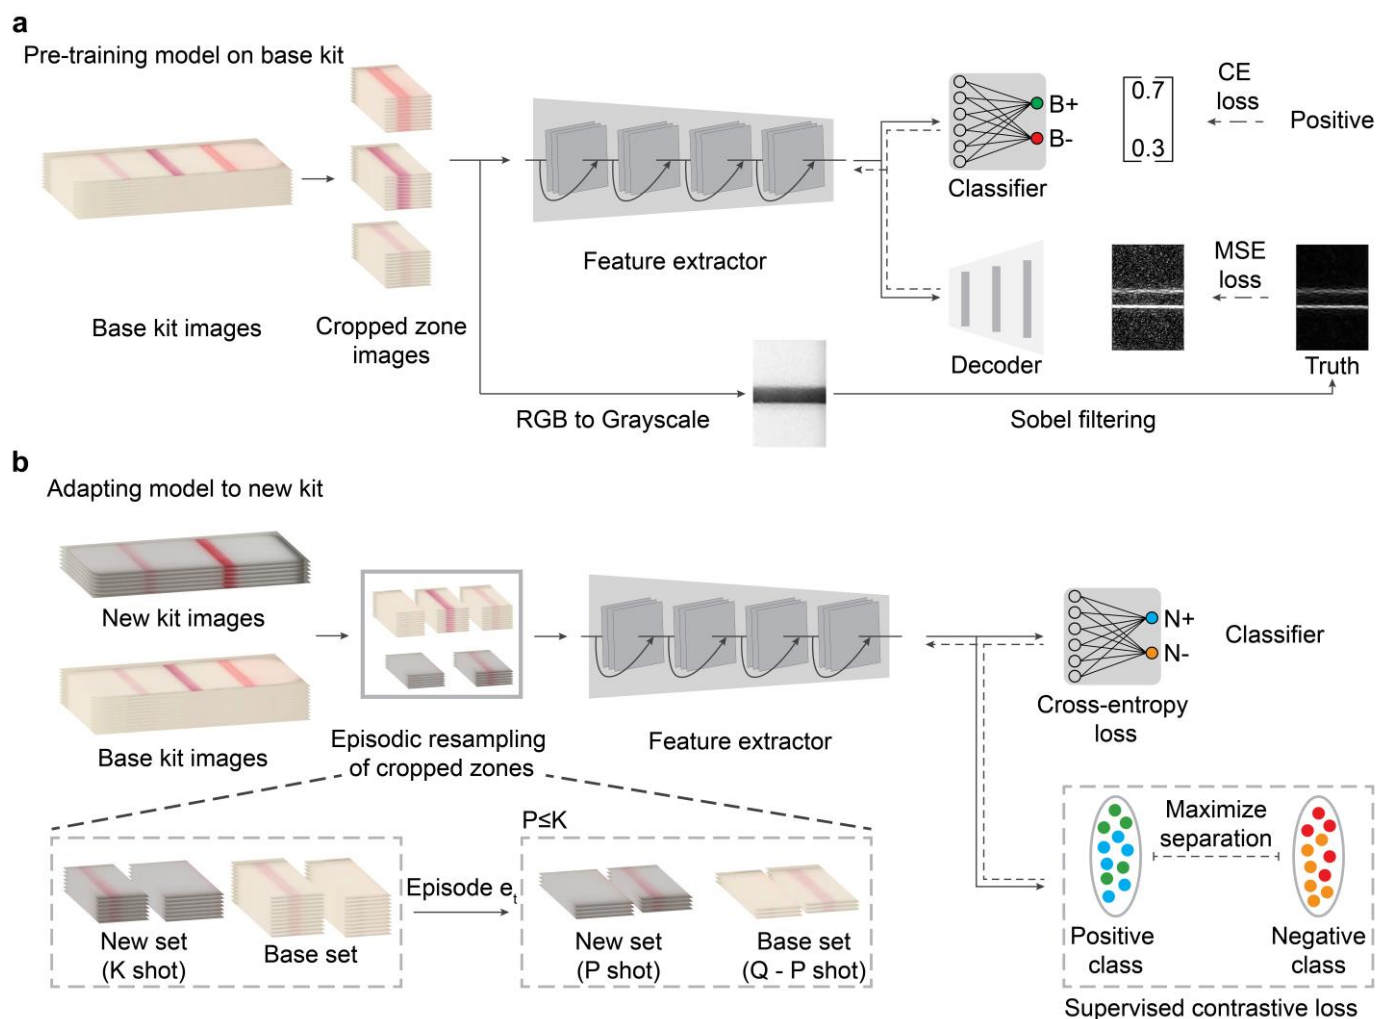

753  
 754 **Figure 2. Self-supervision and few-shot adaptation for LFA kits.** (a) The feature extractor is  
 755 pretrained on the base kit using self-supervised learning task over edge-filtered patterns and  
 756 fully-supervised binary classification task. For each zone, fully-supervised binary classification  
 757 is carried out with cross-entropy loss with the annotated binary labels. Sobel filter is used to  
 758 highlight the edge pixels between the band and the background of the membrane. The edge  
 759 image after normalization is used as ground truth and the learning process is used to reconstruct  
 760 an image that resembles the ground truth edge image, with the quality measured in MSE (Mean  
 761 Square Error). The solid and dashed arrows indicate forward processing and gradient  
 762 backpropagation respectively during the learning process. (b) Model adaptation is carried out by

763 supervised contrastive learning to regularize the feature extractor and fully-supervised learning  
764 to learn an adapted classifier for the new kit. A sampling strategy to build an episode with Q  
765 (e.g., 32) images per class is used: for each class (positive or negative), given K (e.g., 10) images  
766 available, P (e.g., 4) images are subsampled from the new kit and mixed with Q-P images of the  
767 base kit.



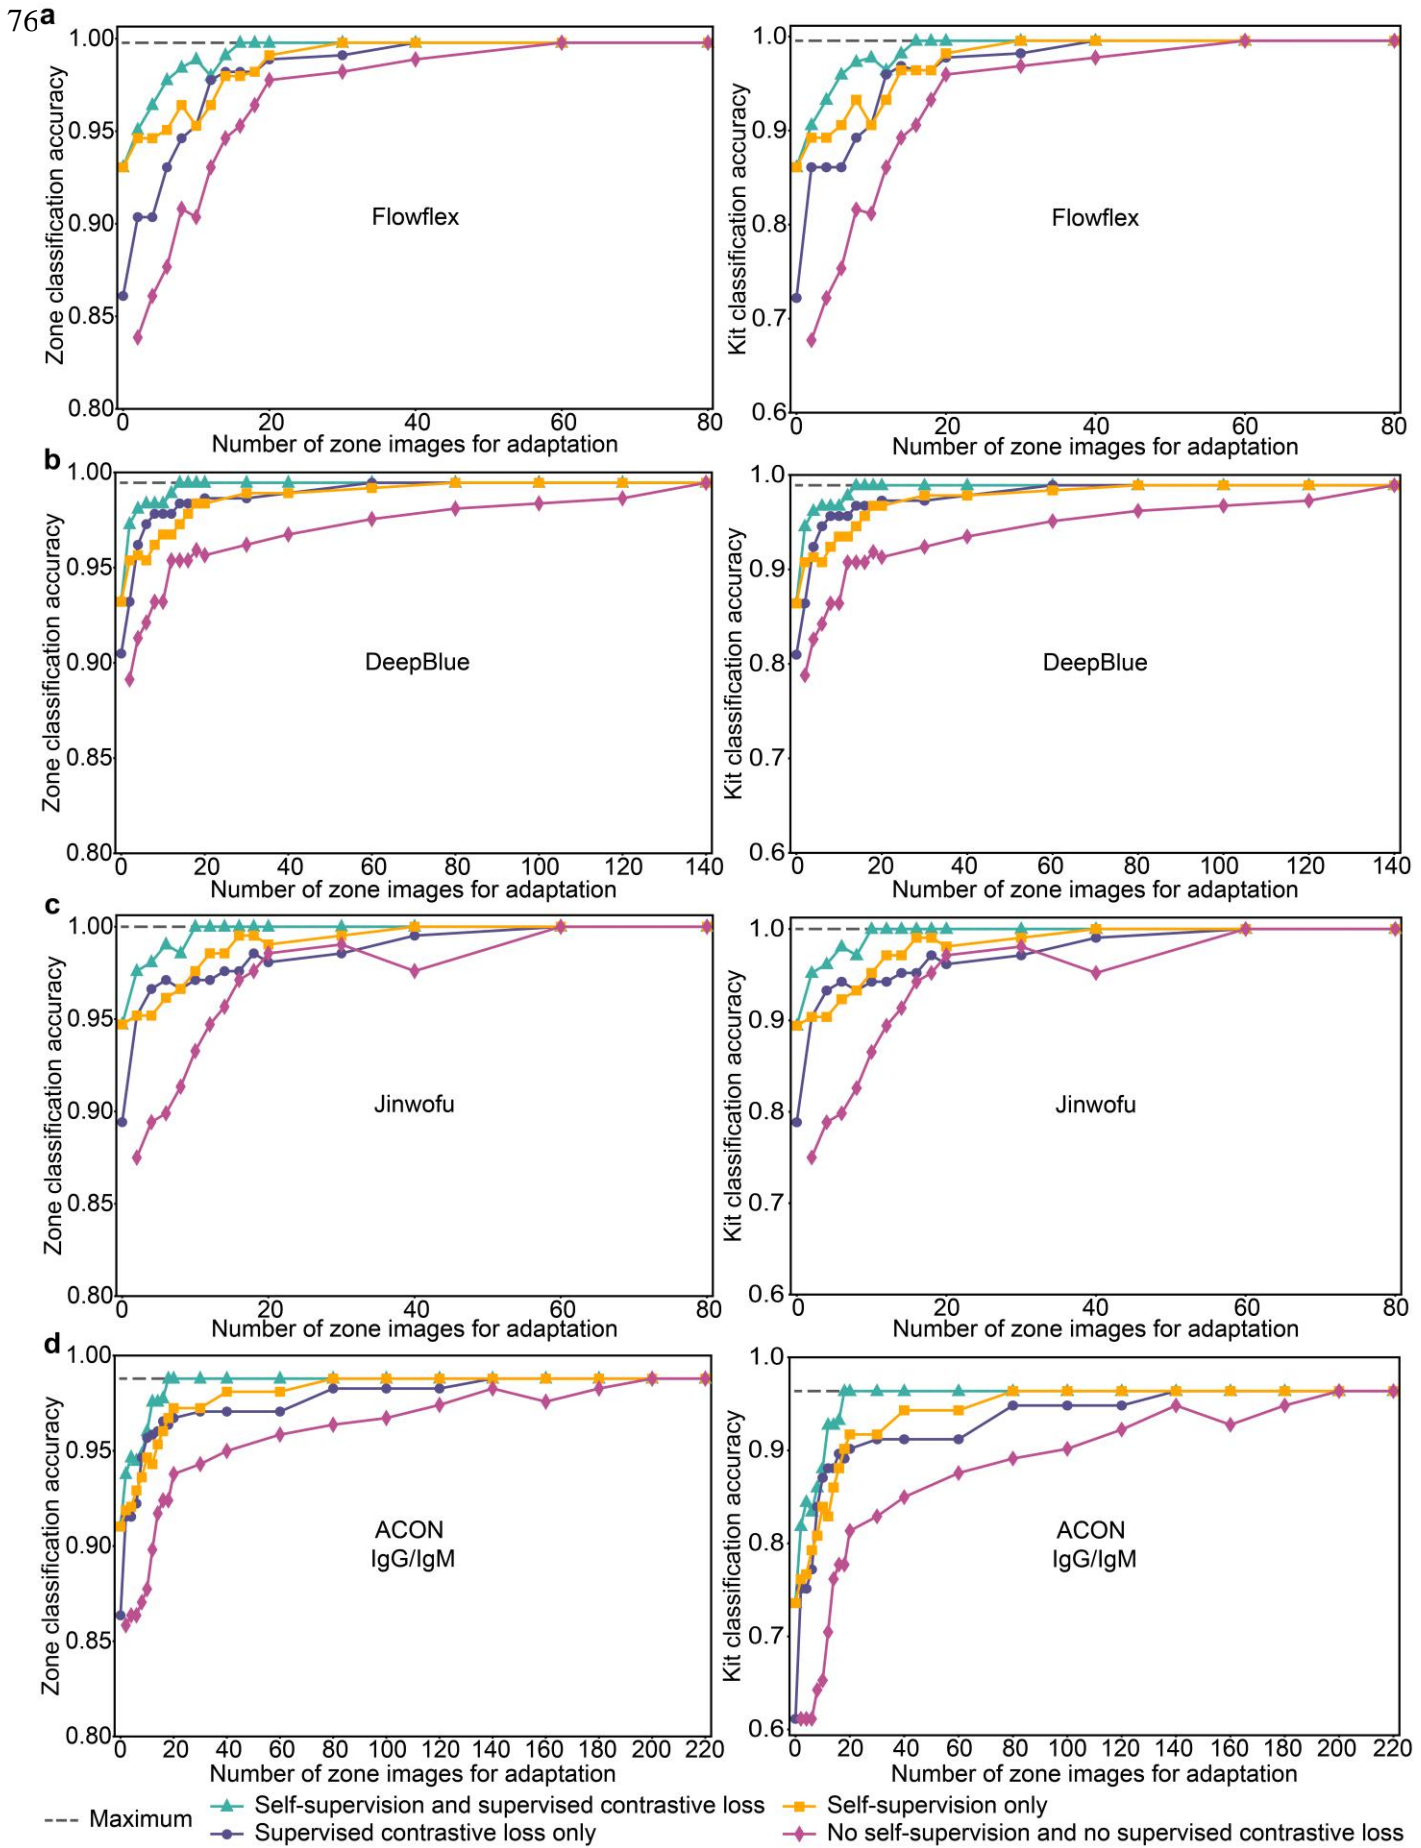

769 **Figure 3. Zone-level and kit-level classification accuracies for four new COVID-19 LFA**  
770 **kits shown with ablated models and number of new kit training images.** Ablation studies  
771 were carried out to analyze the relative contributions of self-supervised learning for feature  
772 extraction and supervised contrastive learning for adaptation. Each model was evaluated by  
773 varying the number of images used in the adaptation. Zone-level accuracy scores (left) and kit-  
774 level accuracy scores (right) reported for four new assay kits, **(a)** Flowflex, **(b)** DeepBlue, **(c)**  
775 Jinwofu and **(d)** ACON IgG/IgM. (The EcoTest housing 2 kit was identical in all aspects to the  
776 base kit expect for the housing, so the direct application of the base model without any  
777 adaptation was able to achieve 100% zone-level and kit-level accuracies.) The maximum  
778 accuracy indicates the upper bound attained by training a model from scratch using all training  
779 images for each kit.
