# Supplementary material for: Adaptable Automated Interpretation of Rapid Diagnostic Tests Using Few-Shot Learning
Source: bioRxiv or medRxiv preprint supplement (doi:10.1101/2021.06.23.21258927), 2021-06-25
Supplement: Supplementary file [file media-1.pdf]

1 **Supplementary Information for:**

2  
3 **Adaptable Automated Interpretation of Rapid Diagnostic Tests Using Few-Shot Learning**

4  
5 Siddarth Arumugam<sup>1†</sup>; Jiawei Ma<sup>2†</sup>; Uzay Macar<sup>2</sup>; Guangxing Han<sup>3</sup>; Kathrine McAulay<sup>4</sup>; Darrell  
6 Ingram<sup>5</sup>; Alex Ying<sup>1</sup>; David A. M. Colburn<sup>1</sup>; Robert Stanciu<sup>1</sup>; Thomas Grys<sup>4</sup>; Shih-Fu Chang<sup>2,3\*</sup>;

7 Samuel K. Sia<sup>1\*</sup>

8  
9 <sup>1</sup> Department of Biomedical Engineering, Columbia University, New York, NY 10027, USA

10 <sup>2</sup> Department of Computer Science, Columbia University, New York, NY 10027, USA

11 <sup>3</sup> Department of Electrical Engineering, Columbia University, New York, NY 10027, USA

12 <sup>4</sup> Department of Laboratory Medicine and Pathology, Mayo Clinic, Phoenix, AZ 85054, USA

13 <sup>5</sup> Safe Health Systems, Inc., Los Angeles, CA 90036, USA

14  
15 † These authors contributed equally to this article.

16 \* Co-corresponding authors.

17  
18 **Key words:** Few-shot adaptation, rapid diagnostic tests, self-supervision, COVID-19, pandemic

25 **Supplementary Tables**

26

| <b>Kit name</b>   | <b>Designation</b> | <b>No. of zones<br/>per kit</b> | <b>Kit aspect<br/>ratio</b> | <b>Membrane<br/>aspect ratio</b> | <b>Zone aspect<br/>ratio</b> |
|-------------------|--------------------|---------------------------------|-----------------------------|----------------------------------|------------------------------|
| EcoTest           | Base               | 3                               | 0.29                        | 0.21                             | 3.23                         |
| Flowflex          | New                | 2                               | 0.28                        | 0.22                             | 2.94                         |
| DeepBlue          | New                | 2                               | 0.28                        | 0.19                             | 2.17                         |
| Jinwofu           | New                | 2                               | 0.30                        | 0.21                             | 3.03                         |
| ACON IgG/IgM      | New                | 3                               | 0.28                        | 0.21                             | 2.86                         |
| EcoTest housing 2 | New                | 3                               | 0.53                        | 0.21                             | 3.13                         |

27

28 **Supplementary Table 1. Assay kit parameters.** Summary of manually measured parameters

29 for each of the assay kits.

30

31

32

33

34

35

36

37

38

39

40

41

42

43

44

45

46

47

48

49

|                             | Flowflex |       | DeepBlue |       | Jinwofu |       | ACON IgG/IgM |       | EcoTest housing 2 |       |
|-----------------------------|----------|-------|----------|-------|---------|-------|--------------|-------|-------------------|-------|
|                             | Zone     | Memb. | Zone     | Memb. | Zone    | Memb. | Zone         | Memb. | Zone              | Memb. |
| Positive class (train)      | 149      | 50    | 125      | 25    | 146     | 50    | 182          | 63    | 20                | 5     |
| Negative class (train)      | 51       | 50    | 75       | 75    | 54      | 50    | 118          | 37    | 10                | 5     |
| Positive class (evaluation) | 305      | 83    | 244      | 60    | 164     | 60    | 386          | 126   | 66                | 21    |
| Negative class (evaluation) | 143      | 141   | 124      | 124   | 44      | 44    | 193          | 67    | 6                 | 3     |

50

51 **Supplementary Table 2. Dataset split of training and evaluation sets for 5 new kits.** The

52 train and evaluation dataset sizes in terms of cropped zone images and membranes for the five

53 new assay kits.

54

55

56

57

58

59

60

61

62

63

64

65

| <b>Kit name</b> | <b>IOU score</b> |
|-----------------|------------------|
| Flowflex        | 0.92 ± 0.009     |
| DeepBlue        | 0.91 ± 0.012     |
| Jinwofu         | 0.91 ± 0.079     |
| ACON IgG/IgM    | 0.92 ± 0.012     |

66

67 **Supplementary Table 3. Mean IoU scores using bootstrapping.** The mean IOU scores for  
68 each of the new kit images, except for the EcoTest housing 2, was obtained by carrying out  
69 bootstrap sampling and obtaining three resamples. Each sample had ten randomly chosen images  
70 from a labelled pool of 30 images for training and the performance was evaluated on a fixed  
71 evaluation set of ten images. Due to a limitation on the available images only a single sampling  
72 was used for the EcoTest housing 2. Data is represented as mean ± standard deviation.

73

74

75

76

77

78

79

80

81

82

83

| <b>Kit name</b> | <b>Zone accuracy (%)</b> | <b>Kit accuracy (%)</b> |
|-----------------|--------------------------|-------------------------|
| Flowflex        | 99.6 ± 0.2               | 99.3 ± 0.3              |
| DeepBlue        | 99.3 ± 0.2               | 98.6 ± 0.4              |
| Jinwofu         | 99.6 ± 0.4               | 99.2 ± 0.7              |
| ACON IgG/IgM    | 98.4 ± 0.5               | 95.3 ± 1.3              |

84

85 **Supplementary Table 4. Mean classification accuracy scores using bootstrapping.** The mean  
86 accuracy values were determined by carrying out 20 trials of bootstrap sampling with 10-shot  
87 adaptation (20 zone images) on the new kit’s training dataset and evaluating the performance on  
88 the evaluation dataset. Data is represented as mean ± standard deviation.

89

90

91

92

93

94

95

96

97

98

99

100

101

102

103

104

105

106

107

108

109

110

111

112

113

114

115 **Supplementary Figures**  
116

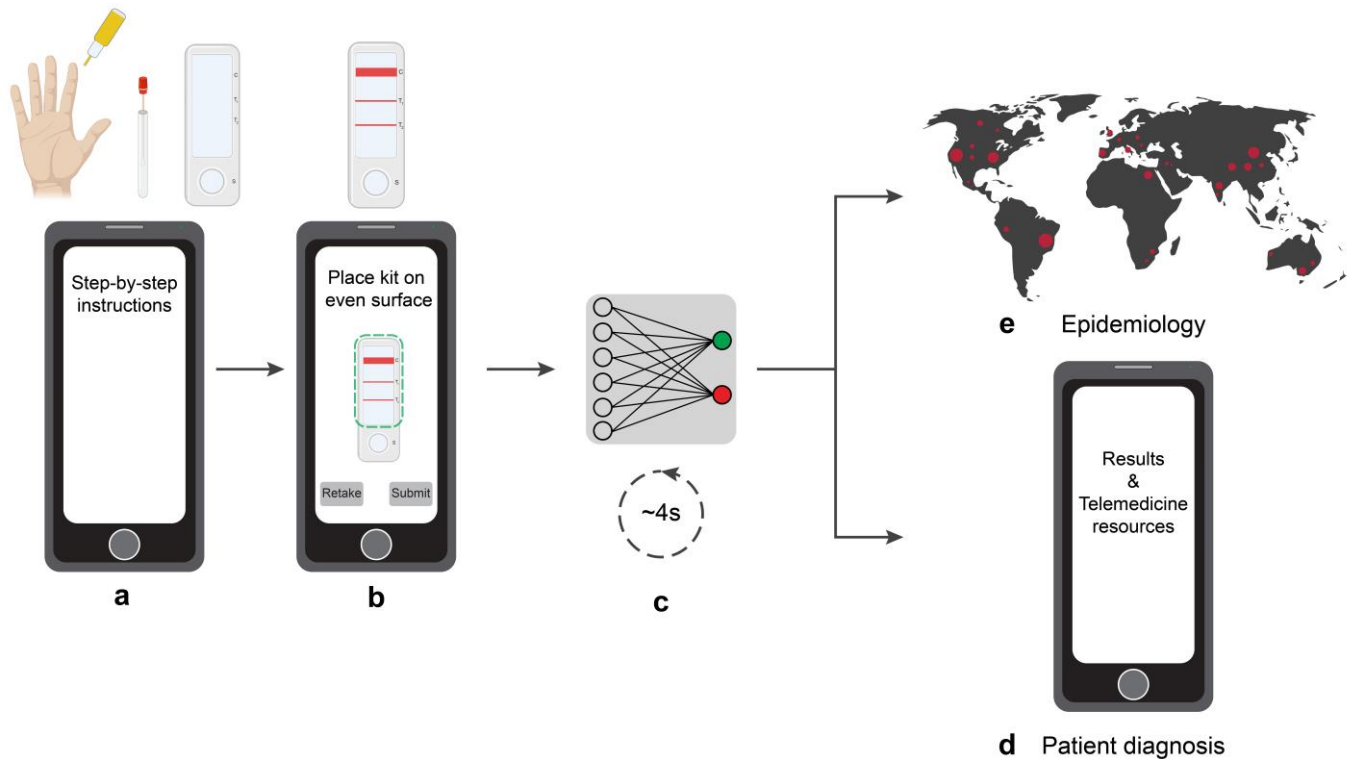

117  
118 **Supplementary Figure 1. Potential role of AutoAdapt LFA within a broader digital**  
119 **platform for supporting rapid testing in decentralized settings. (a)** Step-by-step instructions  
120 to carry out the test. **(b)** App guided image capture. **(c)** Image preprocessing and deep-learning  
121 based classification. **(d)** Results displayed on user's phone and link to resources (sharing,  
122 saving, linkage-to-care). Automatically interpreted test results can also be used with telemedicine  
123 consultation. **(e)** Test results with demographic data stored on cloud server for real-time  
124 surveillance and modeling. (Created with BioRender.com)

125

126

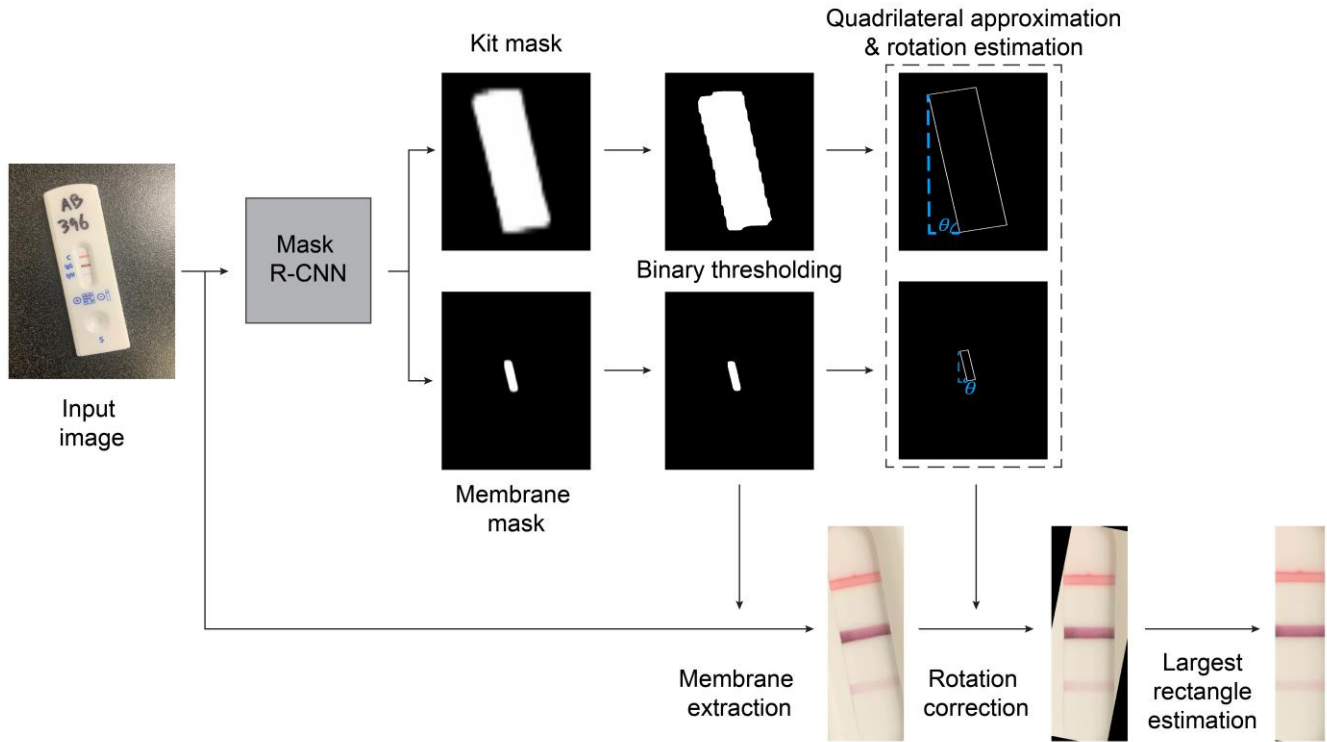

127

128 **Supplementary Figure 2. Workflow for membrane extraction and rotation**

129 **correction.** The assay kit image is passed through the instance segmentation model Mask R-  
 130 CNN. The kit and membrane segmentation masks are obtained and binarized. The kit or the  
 131 membrane mask is used for quadrilateral approximation and rotation estimation in the image, and  
 132 the membrane mask is used to extract the membrane from the input image. The estimated  
 133 rotation value is used to correct the perspective of the extracted membrane. Largest rectangle  
 134 estimation is carried out to remove the black pixels in the rotation-corrected membrane to retain  
 135 only the relevant pixels

136

137

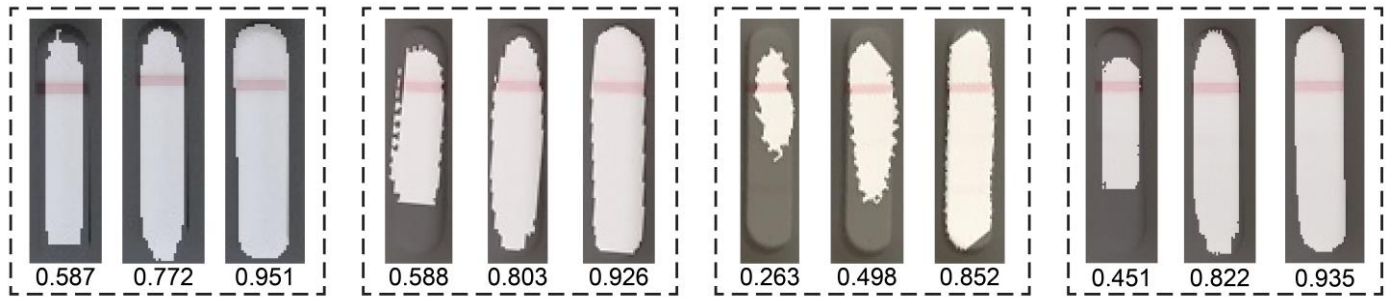

138

139 **Supplementary Figure 3. Illustration of different IoU scores for membrane segmentation.**

140 Images shown are of the EcoTest (base kit) with the membrane segmentation mask overlaid on

141 the zoomed-in image of the membrane. For each membrane image, segmentation masks

142 corresponding to different IoU scores are shown with the score listed below the image.

143
